# Supplementary material
Source: publisher figshare collection journal article supplement (https://sage.figshare.com/ndownloader/files/14701790)
Supplement: Supplementary file 1 [file 14701790]

## **Appendix 1. On-line survey sent to 28 Medical School LC Program Leaders**

1. Name
2. Institution
3. Role- Choose: (Director/co-director, faculty/mentor, Administrative support, other)
4. In what academic year did your learning communities program start?
5. How would you describe the longitudinal relationships in your learning community?
6. For what period of time are students engaged in your learning community? Pre-clerkship, Clerkship, Post-clerkship (choose all applicable)
7. How many students are involved in your learning community?
8. How many faculty are involved in your learning community?
9. How often do your learning communities meet?
10. Please check all of the following objectives that apply to your learning community:  
career advising, academic counseling, mentoring, professional development/professional identity formation, clinical skills curricula, medical humanities curricula, curricula in other content areas, student wellness, community service, social activities, other.
11. Do you have a written program description that addresses the mission, vision, values, goals, and/or activities of your learning community? Yes/No
12. Please attach your learning community program description, if available (upload attachment).
13. If your program has a website please provide the URL.
14. If you do not have a pre-existing program description, please describe your program below, including its overarching purpose, values, goals, and how the program functions.
